# Supplementary material for: 3D printing of nanocellulose hydrogel scaffolds with tunable mechanical strength towards wound healing application
Source: Royal Society of Chemistry journal article supplement (doi:10.1039/c8tb01757c), 2018-01-01
Supplement: c8tb01757c1.pdf [file c8tb01757c1.pdf]

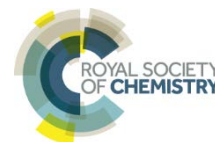

**Journal Name**

ARTICLE

**Supplementary data**

## **3D printing of nanocellulose hydrogel scaffolds with tunable mechanical strength towards wound healing application**

### **Table of contents**

Figure S1. NMR spectra of hydrogels: a) printed CNF hydrogel scaffold without BDDE crosslinking, b) printed CNF hydrogel scaffold with low level of BDDE crosslinking, c) printed CNF hydrogel scaffold with high level of BDDE crosslinking.

Figure S2. Microscope images of the printed scaffolds without BDDE crosslinking (control) (a and b), with low level of BDDE crosslinking (c and d), and with high level of BDDE crosslinking (e and f). Images a, c, and e were taken on the first day when the scaffold was made and images b, d, and f were taken after three months.

Video S1. Printing of scaffolds from nanocellulose hydrogel.

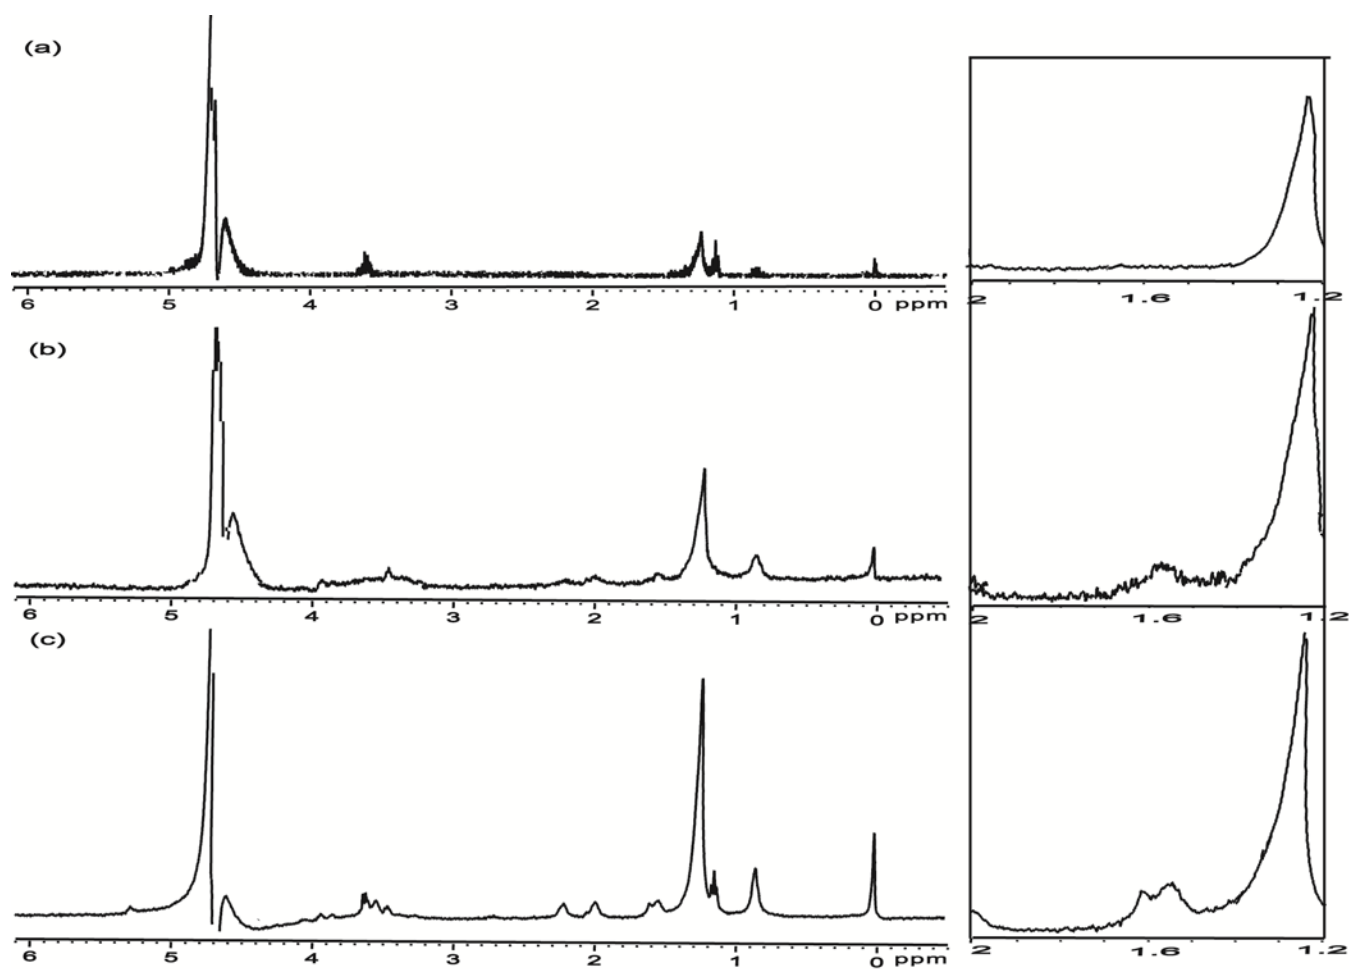

Figure S1.

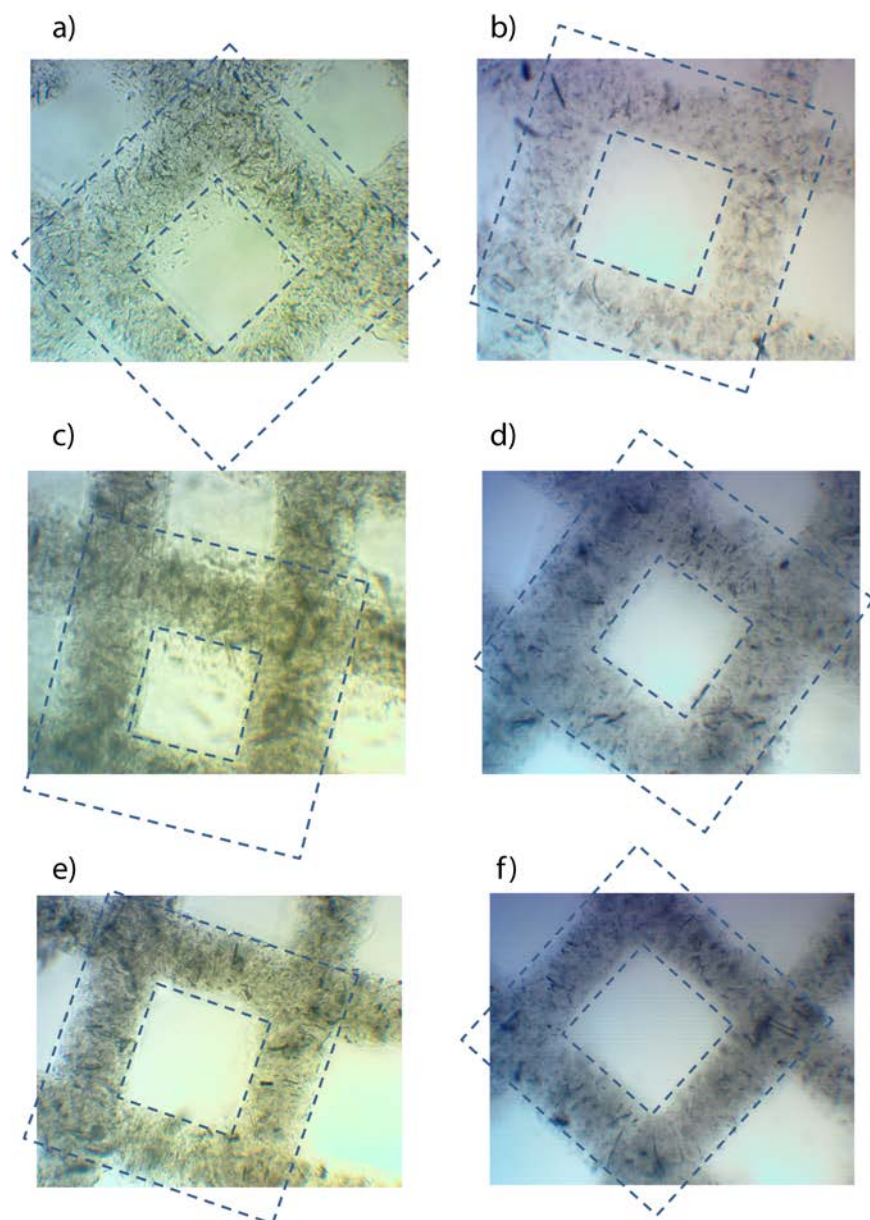

**Figure S2.**

**Video S1.** Printing of scaffolds from nanocellulose hydrogel is reported as a separate .avi file.
